# Supplementary material for: Bio-assembly of CdSxSe1−x quantum dots in ryegrass
Source: Royal Society of Chemistry journal article supplement (doi:10.1039/c9gc03443a), 2019-01-01
Supplement: c9gc03443a1.pdf [file c9gc03443a1.pdf]

*Supporting Information for*

**Self-assembly of CdS<sub>x</sub>Se<sub>1-x</sub> Quantum Dots in Ryegrass**

Li-Jiao Tian,<sup>a</sup> Nan-Qing Zhou,<sup>a</sup> Lin-Hui Yu,<sup>b</sup> Ting-Ting Zhu,<sup>a</sup> Wen-Wei Li,<sup>\*a</sup> Peng-  
Fei An,<sup>c</sup> Jing-Yuan Ma,<sup>d</sup> Cheng-Bin Xiang,<sup>b</sup>

<sup>a</sup>CAS Key Laboratory of Urban Pollutant Conversion, Department of Applied Chemistry, University of Science and Technology of China, Hefei, 230026, China

<sup>b</sup>School of Life Sciences, University of Science and Technology of China, Hefei 230027, China

<sup>c</sup>Beijing Synchrotron Radiation Laboratory, Institute of High Energy Physics, Chinese Academy of Science, Beijing, 100049, China

<sup>d</sup>Shanghai Synchrotron Radiation Facility, Shanghai Institute of Applied Physics, Chinese Academy of Sciences, Shanghai 201204, China

This supporting information contains 18-page document, including materials and methods, 3 tables, 11 figures and this cover page.

## 1 MATERIALS AND METHODS

2 **Plants Cultivation and QDs Biosynthesis.** The QDs were assembled in *Lolium*  
3 *perenne* following the procedures shown in Fig. S1. The seeds were germinated in trays  
4 covered with gauze and moistened with water. The water was renewed every 3 days.  
5 After 2-week cultivation, for each test 18 ryegrass were transferred to 1/2 murashige  
6 and skoog (MS) medium in a 500-mL container, and thereafter were grown in a climate  
7 chamber at 24 °C with 70% humidity under alternate 16-h light and 8-h darkness. The  
8 solutions were renewed every 3 days. After cultivation for one month, the ryegrasses  
9 were transferred into a medium containing 1/2 MS salt and 100  $\mu\text{M}$   $\text{Na}_2\text{SeO}_4$  for one  
10 day, followed by growing in another media with 1/2 MS salt, 100  $\mu\text{M}$   $\text{Na}_2\text{SeO}_4$  and 800  
11  $\mu\text{M}$   $\text{CdCl}_2$  for two more days. For the Se-only group, the ryegrasses were transferred  
12 into a medium containing 1/2 MS salt and 100  $\mu\text{M}$   $\text{Na}_2\text{SeO}_4$  for one day, followed by  
13 growing in another media with 1/2 MS salt, 100  $\mu\text{M}$   $\text{Na}_2\text{SeO}_4$  for two more days. For  
14 the Cd-only group, the ryegrasses were transferred into a medium containing 1/2 MS  
15 salt and 800  $\mu\text{M}$   $\text{CdCl}_2$  for two days. At last, the ryegrasses were collected, rinsed  
16 externally with millipore water to remove the absorbed ions. The harvested plant  
17 biomass was separated into different tissues (leaves, stems, and roots) and freeze-dried  
18 at 0.05 mbar and -20 °C for 24 h (FreeZone 2.5, Labconco Co., USA).

19 **TEM Observation.** For TEM analyses, samples were fixed overnight with 5%  
20 glutaraldehyde in 0.1 M phosphate buffer (pH 7.2). Fixed samples were dehydrated by  
21 step-wise increasing the contents of ethanol in deionized water (0%, 30%, 50%, 70%,  
22 80%, 95%, 100%), and then were embedded in Spur resin. The embedded samples were  
23 cut into 100 nm sections using ultramicrotome (Leica EM UC7) and then transformed  
24 on copper grids with carbon coated. TEM (JEM-2011 JEOL Co., Japan) observation of  
25 the samples was conducted at 200 kV accelerating voltage.

26        **Characterization of the Purified QDs.** The washed ryegrass was re-suspended  
27 in 10 mM Tris-HCl (pH=7.6) buffer and disrupted by liquid nitrogen grinding. The  
28 broken liquid was filtered through 0.22- $\mu$ m membrane. The filter liquor was transferred  
29 into a new centrifuge tube, and then centrifuged ( $15000 \times g$ , 10 min) to collect the  
30 nanoparticles-containing supernatant. Then, the supernatant was added with proteinase  
31 K and incubated at 37 °C for 1 h. The resulting solution was centrifuged ( $15000 \times g$ , 10  
32 min) and washed 3 times using Amicon Ultra-15 50K centrifugal filter device. This  
33 QDs-rich solution was used for high-resolution transmission electron microscopy  
34 (HRTEM) analysis (2010F, JEOL Co., Japan), X-ray diffraction and XAFS  
35 measurements. The crystalline properties of the purified QDs were measured using X-  
36 ray diffraction beamline (BL14B1) of SSRF. The collecting range of  $2\theta$  was 10-70  
37 degree.

38        **XAFS Measurement.** The dried ryegrass and purified nanoparticles were fixed  
39 on Kapton tape for XAFS analyses. Se XAFS were measured at the beamline 1W1B of  
40 Beijing Synchrotron Radiation Facility (BSRF), China. Cd *K*-edge XAFS were  
41 recorded at the beamline BL14W1 of Shanghai Synchrotron Radiation Facility (SSRF).  
42 The XAFS were collected and analysed following our reported work.<sup>1</sup>

43        **XANES Analyses.** The sample XANES spectra were quantitatively analyzed by  
44 linear combination fitting (LCF) based on the standard spectra of CdSe, Na<sub>2</sub>SeO<sub>4</sub>,  
45 Na<sub>2</sub>SeO<sub>3</sub>, seleno-L-methionine and Se<sup>0</sup>. In light of the similarity of organo-Se species  
46 (e.g., Se-methionine and Se-cysteine) in their XAS spectra, seleno-L-methionine was  
47 used as the reference for organo-Se compounds. LCF was performed over the energy  
48 range 12645 to 12700 eV. Individual LCF fractions were constrained to a range between  
49 0 and 1, and the sum of all fractions was set as 1.

50 EXAFS Analyses. All the curve-fittings were performed using the ARTEMIS  
51 module implemented in the IFEFFIT package. In Se curve fittings, the amplitude  
52 reduction factor  $S_0^2$  was fixed at 0.8 as determined by fitting the data of CdSe standard.  
53 Fittings were conducted in the R-space for  $k^3$ -weighted  $\chi(k)$  functions with Hanning  
54 windows ( $dk = 1.0 \text{ \AA}^{-1}$ ). For the root sample, a k-range of 2.8-13.7  $\text{\AA}^{-1}$  and R-range of  
55 1.2-2.8  $\text{\AA}$  was used. For the stem sample, a k-range of 2.7-11.5  $\text{\AA}^{-1}$  and R-range of 1.2-  
56 2.8  $\text{\AA}$  was used. For the leave sample, a k-range of 3-12  $\text{\AA}^{-1}$  and R-range of 1.1-2.8  $\text{\AA}$   
57 was used. According to the reported articles,<sup>2, 3</sup> the samples have been fitted together  
58 with same Debye-Waller factors ( $\sigma^2$ ) and energy shift ( $\Delta E_0$ ) to reduce the number of  
59 adjustable parameters. Therefore the number of independent points for these three  
60 samples when fitting together are  $N_{ipt} = (2\Delta k \cdot \Delta R/\pi)_{root} + (2\Delta k \cdot \Delta R/\pi)_{stem} + (2\Delta k \cdot$   
61  $\Delta R/\pi)_{leave} = 2 \times (13.7-2.8) \times (2.8-1.2)/\pi + 2 \times (11.5-2.7) \times (2.8-1.2)/\pi + 2 \times (12-3) \times (2.8-$   
62  $1.1)/\pi = 29$ . The number of adjustable parameters in the fits is 28, less than  $N_{ipt}$  (29).

63 In Cd curve fittings, the amplitude reduction factor  $S_0^2$  was fixed at a value of 0.8  
64 as determined by fitting the data of CdSe standard. Fittings were performed in the R-  
65 space for  $k^3$ -weighted  $\chi(k)$  functions with Hanning windows ( $dk = 1.0 \text{ \AA}^{-1}$ ). For the root  
66 sample, a k-range of 2.1-9.5  $\text{\AA}^{-1}$  and R-range of 1-2.8  $\text{\AA}$  was used. For the stem sample,  
67 a k-range of 2.1-9.2  $\text{\AA}^{-1}$  and R-range of 1.1-2.9  $\text{\AA}$  was used. For the leave sample, a k-  
68 range of 2.3-9.8  $\text{\AA}^{-1}$  and R-range of 1-2.8  $\text{\AA}$  was used. The samples were fitted together  
69 with same Debye-Waller factors ( $\sigma^2$ ) and energy shift ( $\Delta E_0$ ) to reduce the number of  
70 adjustable parameters. Therefore, the number of independent points for the three  
71 samples when fitting together was  $N_{ipt} = (2\Delta k \cdot \Delta R/\pi)_{root} + (2\Delta k \cdot \Delta R/\pi)_{stem} + (2\Delta k \cdot$   
72  $\Delta R/\pi)_{leave} = 2 \times (9.5-2.1) \times (2.8-1)/\pi + 2 \times (9.2-2.1) \times (2.9-1.1)/\pi + 2 \times (9.8-2.3) \times (2.8-1)/\pi$   
73  $= 24$ . The number of adjustable parameters in the fits was 16, less than  $N_{ipt}$  (24).

74 **μ-SXRF Mapping.** The washed tissues of ryegrass were cut into ~3 cm sections,  
75 and placed between two pieces of Kapton polyimide film. The samples were rapidly  
76 frozen in liquid nitrogen and freeze-dried with vacuum freeze dryer (FreeZone 2.5,  
77 Labconco Co., USA). The μ-SXRF mapping of the above prepared samples was  
78 analysed at the BL-15U1 beamline of SSRF following our previously work.<sup>4</sup>

79 **Fluorescence Microscope Observation.** The washed roots were loaded on a glass  
80 slide for fluorescence observation. Fluorescence images were taken by a wide field  
81 fluorescent microscope (BX-51, Olympus Co., Japan) under 120 W mercury lamp (X-  
82 Cite 120 Q) irradiation, and recorded using DP2-BSW software (Olympus Co., Japan).  
83 The lamp was equipped with a wideband MWU2 filter (Ex 330-385 nm) and a water  
84 immersion objective (10×).

85 **Cd Spatial Distribution.** The distribution of Cd in ryegrass after exposure to  
86 Na<sub>2</sub>SeO<sub>4</sub> and CdCl<sub>2</sub> for 2 days was visualized using Cd specific probe Leadmium™  
87 Green AM (Invitrogen, Carlsbad, CA, USA). According to the manufacture's  
88 instructions, the washed roots and leaves were immersed in the dye solution at 37 °C  
89 for 4 h in the dark, then washed with 0.85 % NaCl three times prior to fluorescence  
90 microscopic examination.

91

**Table S1. Linear Combination Fitting Analyses of the XANES Spectra**

| Samples                               | CdSe | Na <sub>2</sub> SeO <sub>4</sub> | organo-Se | Se <sup>0</sup> |
|---------------------------------------|------|----------------------------------|-----------|-----------------|
| Root - purified from Cd & Se treated  | 40   | 3                                | 50        | 7               |
| Stem - purified from Cd & Se treated  | 28   | 0                                | 65        | 7               |
| Leave - purified from Cd & Se treated | 24   | 4                                | 70        | 2               |

**Table S2. Se *K*-edge EXAFS Curve Fitting Parameters<sup>a</sup>**

| Samples                                       | Shell | <i>N</i> | <i>R</i> (Å) | $\sigma^2$<br>(Å <sup>2</sup> ) | $\Delta E_0$<br>(eV) | <i>R</i><br>(%) |
|-----------------------------------------------|-------|----------|--------------|---------------------------------|----------------------|-----------------|
| Se <sup>b</sup>                               | Se-Se | <b>2</b> | 2.38 (1)     | 0.004 (1)                       | 6.9 (4)              | 0.1             |
| CdSe <sup>b</sup>                             | Se-Cd | <b>4</b> | 2.62 (1)     | 0.005 (1)                       | 2.8 (4)              | 0.1             |
| Na <sub>2</sub> SeO <sub>3</sub> <sup>b</sup> | Se-O  | <b>3</b> | 1.70 (1)     | 0.002 (3)                       | 8.9 (5)              | 0.7             |
| SeMet <sup>b</sup>                            | Se-C  | <b>6</b> | 1.96 (1)     | 0.002 (4)                       | 8.7 (7)              | 0.9             |
| Root <sup>c</sup>                             | Se-Se | 0.3 (1)  | 2.35 (1)     | 0.004 (2)                       | 2.0 (8)              | 1.2             |
|                                               | Se-Cd | 1.8 (4)  | 2.61 (1)     | 0.005 (1)                       | 2.2 (2)              |                 |
|                                               | Se-C  | 1.5 (3)  | 1.89 (3)     | 0.003 (1)                       | 8.7 (7)              |                 |
| Stem <sup>d</sup>                             | Se-Se | 0.3 (1)  | 2.36 (4)     | 0.004 (2)                       | 2.0 (8)              | 1.2             |
|                                               | Se-Cd | 1.5 (3)  | 2.61 (2)     | 0.005 (1)                       | 2.2 (2)              |                 |
|                                               | Se-C  | 2.1 (4)  | 1.89 (3)     | 0.003 (4)                       | 8.7 (7)              |                 |
| Leave <sup>e</sup>                            | Se-Se | 0.2 (4)  | 2.39 (9)     | 0.004 (6)                       | 2.0 (8)              | 1.2             |
|                                               | Se-Cd | 0.8 (6)  | 2.60(1)      | 0.005 (2)                       | 2.2 (2)              |                 |
|                                               | Se-C  | 3.7 (4)  | 1.92 (4)     | 0.003 (4)                       | 8.7 (7)              |                 |
|                                               | Se-O  | 1.3 (6)  | 1.75 (2)     | 0.003 (5)                       | 8.3 (4)              |                 |

<sup>a</sup>*N*, coordination number; *R*, distance between absorber and backscatter atoms;  $\sigma^2$ , Debye–Waller factor to account for both thermal and structural disorders;  $\Delta E_0$ , the shift of the energy threshold; *R* factor (%) indicates the goodness of the fit. Errors are given in brackets.  $S_0^2$  was fixed to 0.8 as determined from CdSe standard fitting. Bold numbers indicate fixed coordination number (*N*) according to the crystal structure. <sup>b</sup> The same as in our previous work.<sup>5</sup> <sup>c</sup> Fitting range:  $2.8 \leq k$  (/Å)  $\leq 13.7$  and  $1.2 \leq R$  (Å)  $\leq 2.8$ . <sup>d</sup> Fitting range:  $2.7 \leq k$  (/Å)  $\leq 11.5$  and  $1.2 \leq R$  (Å)  $\leq 2.8$ . <sup>e</sup> Fitting range:  $3 \leq k$  (/Å)  $\leq 12$  and  $1.1 \leq R$  (Å)  $\leq 2.8$ .

**Table S3. Cd *K*-edge EXAFS Curve Fitting Parameters<sup>a</sup> obtained with two atomic shells**

| Samples                                                      | Shell | <i>N</i> | <i>R</i><br>(Å) | $\sigma^2$<br>(Å <sup>2</sup> ) | $\Delta E_0$<br>(eV) | <i>R</i><br>(%) |
|--------------------------------------------------------------|-------|----------|-----------------|---------------------------------|----------------------|-----------------|
| CdO <sup>b</sup>                                             | Cd-O  | <b>6</b> | 2.32 (1)        | 0.008 (1)                       | 1.0 (7)              | 1.5             |
| CdS <sup>c</sup>                                             | Cd-S  | <b>4</b> | 2.52 (1)        | 0.006 (1)                       | 1.9 (5)              | 0.1             |
| CdSe <sup>d</sup>                                            | Cd-Se | <b>4</b> | 2.63 (1)        | 0.006 (1)                       | 3.0 (6)              | 0.1             |
| Cd <sub>3</sub> (PO <sub>4</sub> ) <sub>2</sub> <sup>e</sup> | Cd-O  | 6.6 (5)  | 2.28 (2)        | 0.011 (1)                       | 3.3 (9)              | 0.3             |
| Root <sup>f</sup>                                            | Cd-S  | 0.7 (5)  | 2.49 (2)        | 0.003 (4)                       | 3.8 (5)              | 1.5             |
|                                                              | Cd-O  | 3.6 (6)  | 2.24 (3)        | 0.008 (3)                       | 5.6 (5)              |                 |
| Stem <sup>g</sup>                                            | Cd-S  | 1.6 (5)  | 2.48 (3)        | 0.003 (4)                       | 3.8 (5)              | 1.5             |
|                                                              | Cd-O  | 2.3 (6)  | 2.25 (5)        | 0.008 (3)                       | 5.6 (5)              |                 |
| Leave <sup>h</sup>                                           | Cd-S  | 2.3 (5)  | 2.46 (4)        | 0.003 (4)                       | 3.8 (5)              | 1.5             |

<sup>a</sup>*N*, coordination number; *R*, distance between absorber and backscatter atoms;  $\sigma^2$ , Debye–Waller factor to account for both thermal and structural disorders;  $\Delta E_0$ , the shift of the energy threshold; *R* factor (%) indicates the goodness of the fit. Errors are given in brackets.  $S_0^2$  was fixed to 0.8 as determined from CdSe standard fitting. Bold numbers indicate fixed coordination number (*N*) according to the crystal structure. <sup>b</sup> The same as in our previous work. <sup>c</sup> Fitting range:  $3 \leq k$  (/Å)  $\leq 11$  and  $1.15 \leq R$  (Å)  $\leq 3$ . <sup>d</sup> Fitting range:  $3 \leq k$  (/Å)  $\leq 10.7$  and  $1.1 \leq R$  (Å)  $\leq 2.9$ . <sup>e</sup> Fitting range:  $3 \leq k$  (/Å)  $\leq 11$  and  $1.1 \leq R$  (Å)  $\leq 2.9$ . <sup>f</sup> Fitting range:  $2.1 \leq k$  (/Å)  $\leq 9.5$  and  $1 \leq R$  (Å)  $\leq 2.8$ . <sup>g</sup> Fitting range:  $2.1 \leq k$  (/Å)  $\leq 9.2$  and  $1.1 \leq R$  (Å)  $\leq 2.9$ . <sup>h</sup> Fitting range:  $2.3 \leq k$  (/Å)  $\leq 9.8$  and  $1 \leq R$  (Å)  $\leq 2.8$ .



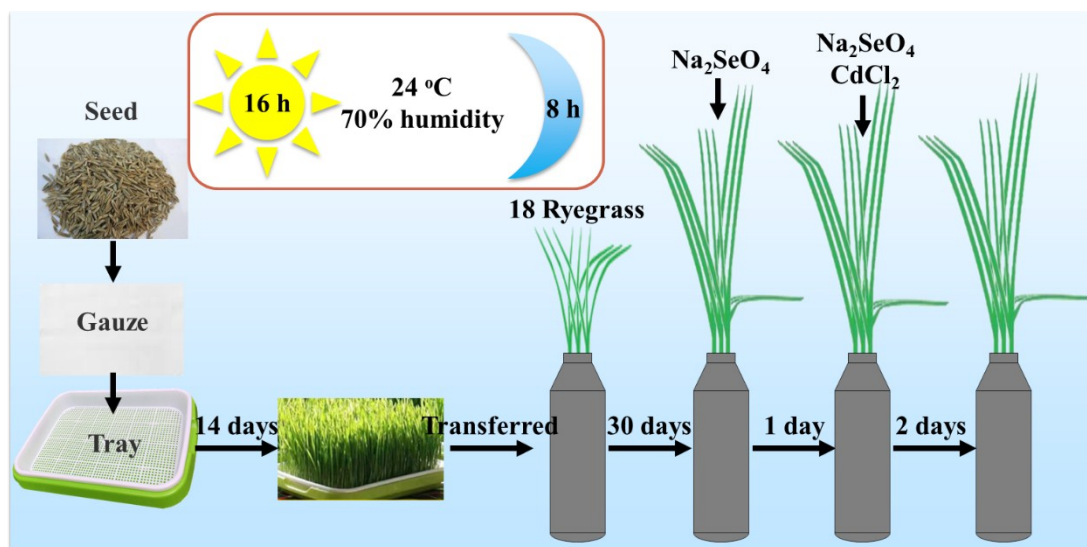

**Fig. S1** Diagram of the experimental procedures for the nanoparticles biosynthesis in ryegrass.

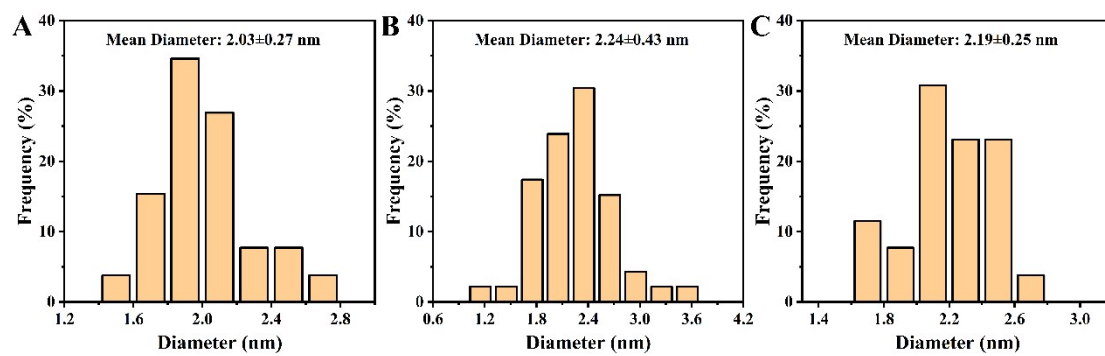

**Fig. S2** Size distribution of the purified nanoparticles from leaves (A), stems (B) and roots (C).

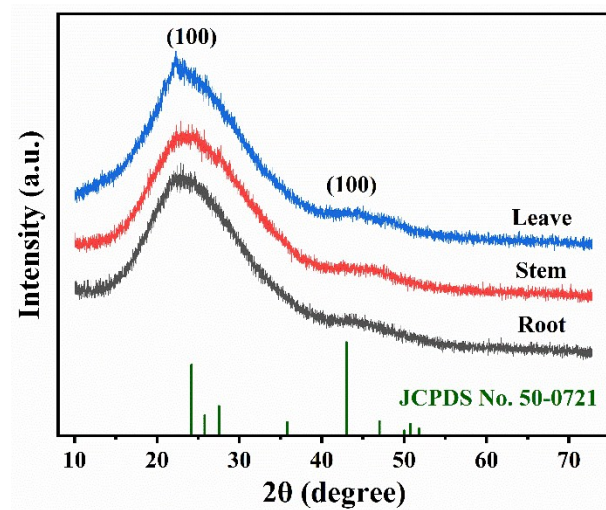

**Fig. S3** X-ray Diffractometer (XRD) patterns of the purified nanoparticles from leaves, stems and roots.

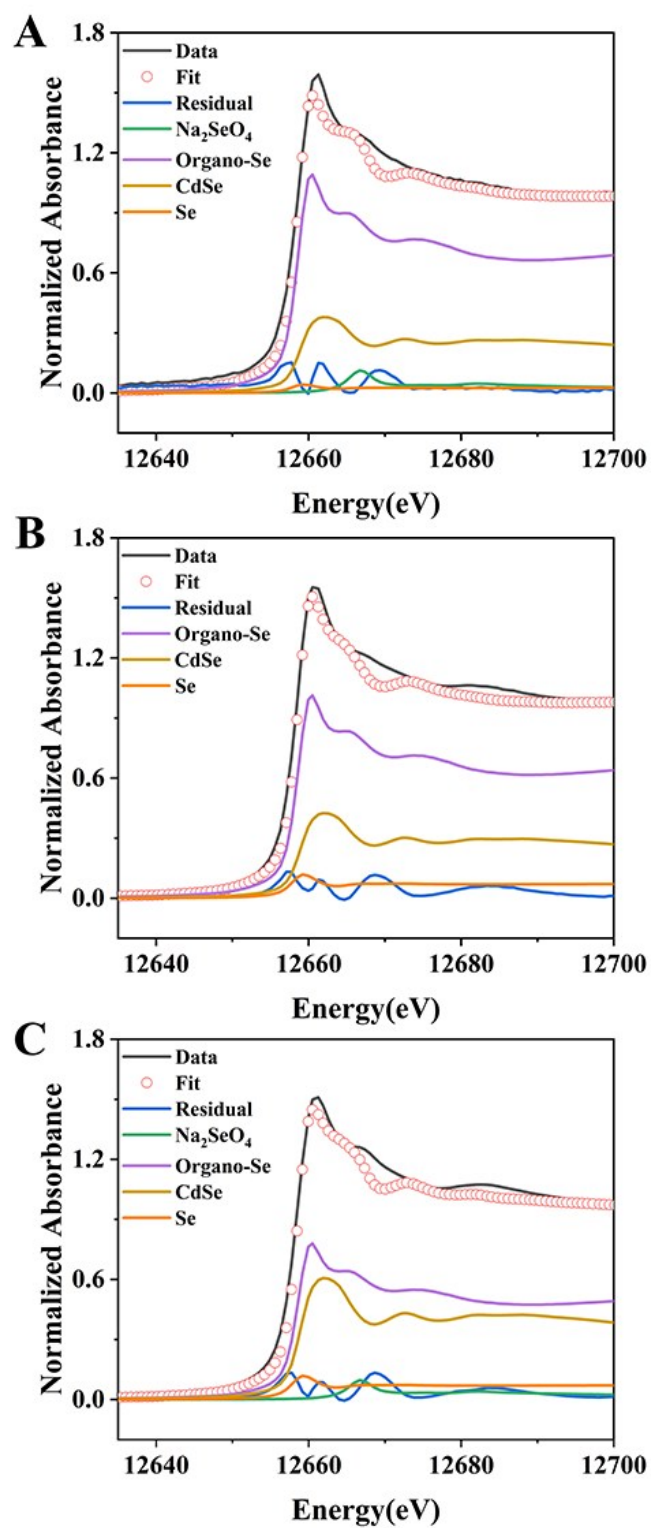

**Fig. S4** LCF results of Se XANES spectra of the purified samples from the leaves (A), stems (B) and roots(C) of the plants treated with Se and Cd.

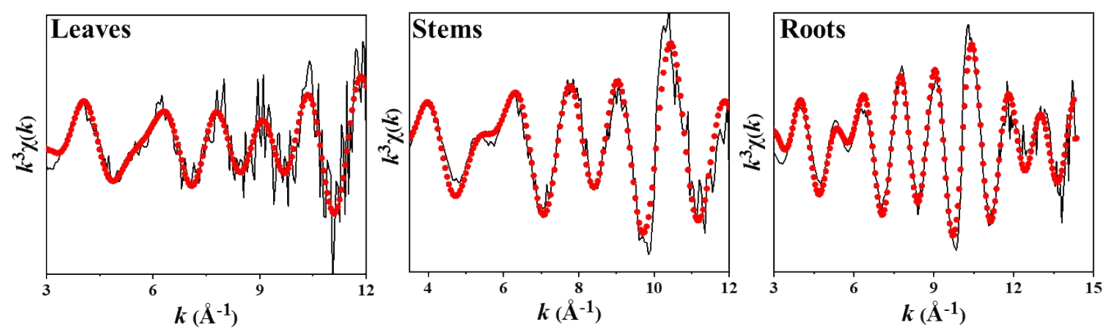

**Fig. S5** Se *K*-edge EXAFS analyses of the purified samples from the roots, stems and leaves of ryegrass in *k* spaces. The theoretical signals (red circle) are superimposed on the experimental one (black line) using the ARTEMIS software. Measured spectra matched with the calculated data very well. The best-fit parameters are shown in Table S2.

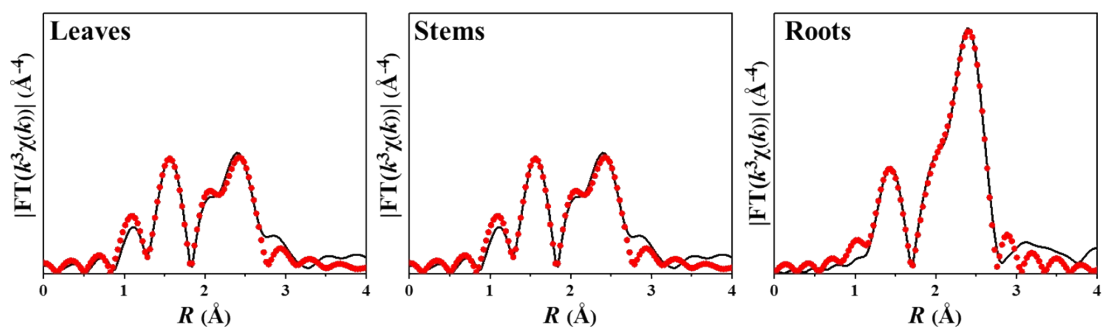

**Fig. S6** Fourier-transformed magnitudes of Se *K*-edge EXAFS spectra in *R* space for the purified samples from the roots, stems and leaves of ryegrass using the ARTEMIS software. Measured spectra (black line) matched with the calculated data (red circle) very well for all standards. The best-fit parameters are shown in Table S2.

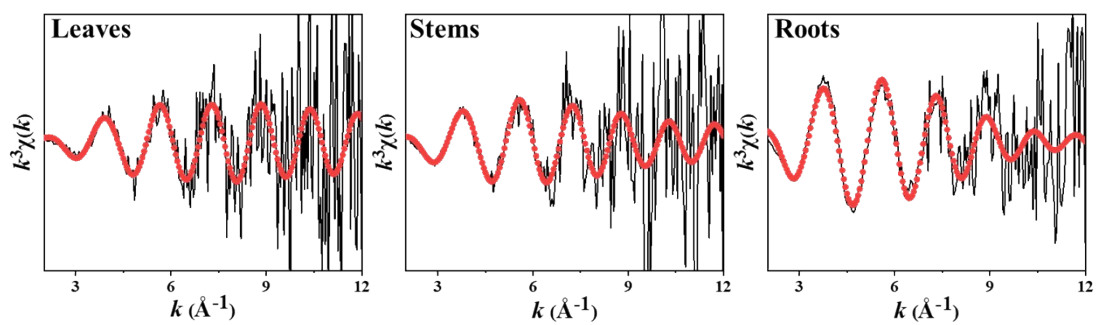

**Fig. S7** Cd *K*-edge EXAFS analysis of the purified samples from the roots, stems and leaves of ryegrass in *k* spaces. The samples were fitted with Cd-S and Cd-O two paths. The theoretical signals (red circle) are superimposed on the experimental one (black line). The best-fit parameters are shown in Table S3.

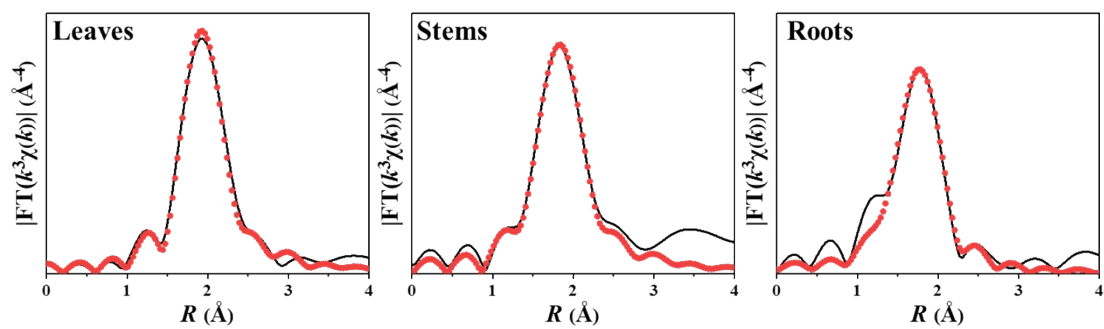

**Fig. S8** Fourier-transformed magnitudes of Cd *K*-edge EXAFS analysis of the purified samples from the roots, stems and leaves of ryegrass in *R* space. The samples were fitted with Cd-S and Cd-O two paths. The theoretical signals (red circle) are superimposed on the experimental one (black line). The best-fit parameters are shown in Table S3.



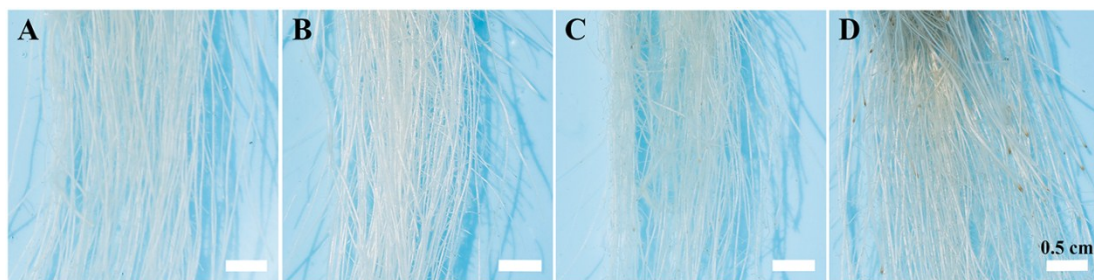

**Fig. S9** Bright field images of the ryegrass under different treatment regimes of Se and Cd, including Blank (A), Na<sub>2</sub>SeO<sub>4</sub> only (B), CdCl<sub>2</sub> only (C) and Na<sub>2</sub>SeO<sub>4</sub> & CdCl<sub>2</sub> (D).

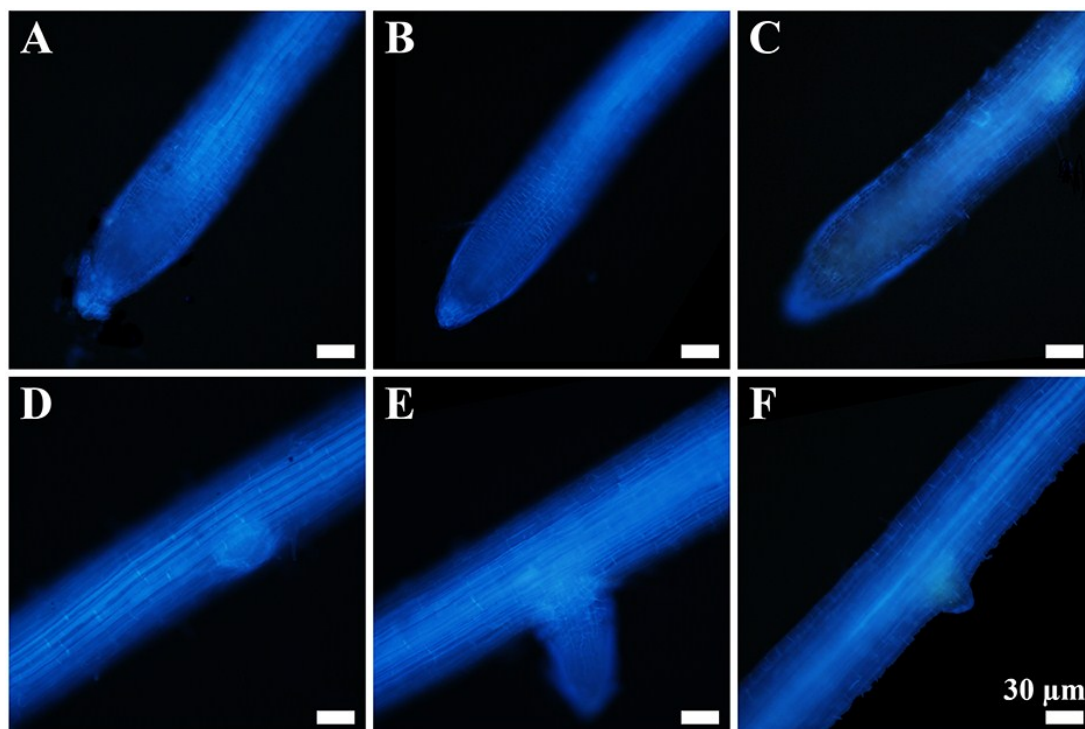

**Fig. S10** Fluorescence images of the ryegrass roots under different treatment regimes of Se and Cd, including Blank (A, D), Na<sub>2</sub>SeO<sub>4</sub> only (B, E), CdCl<sub>2</sub> only (C, F). All images were collected under the same exposure conditions.

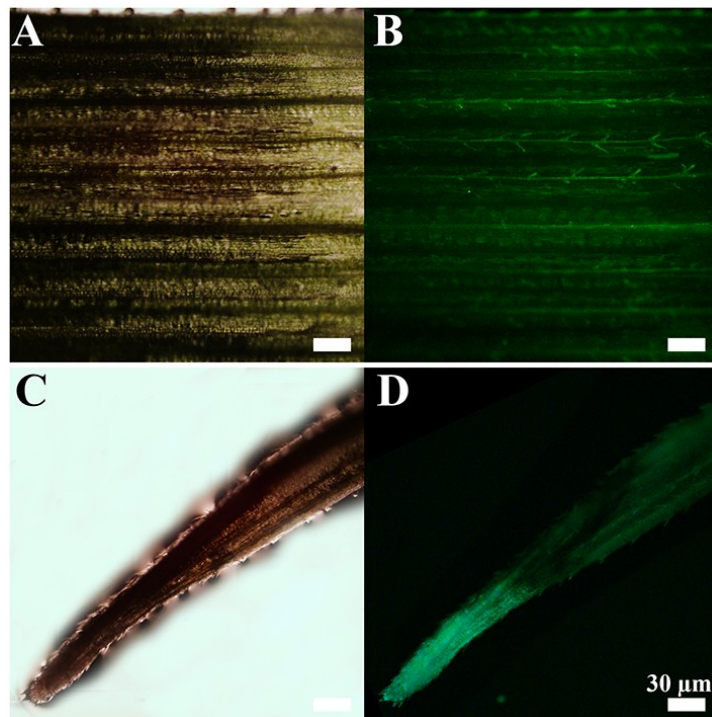

**Fig. S11** Bright field images (A, C) and fluorescence microscopy images (B, D) of the ryegrass leaves with Cd probe staining. The green fluorescence intensity represents the Cd content.

## REFERENCES

1. L. J. Tian, Y. Min, W. W. Li, J. J. Chen, N. Q. Zhou, T. T. Zhu, D. B. Li, J. Y. Ma, P. F. An, L. R. Zheng, H. Huang, Y. Z. Liu and H. Q. Yu, *ACS Nano*, 2019, **13**, 5841-5851.
2. A. I. Frenkel, E. A. Stern, M. Qian and M. Newville, *Phys. Rev. B Condens. Matter*, 1993, **48**, 12449-12458.
3. S. Wei and Z. Sun, *J. Phys-Condens. Mat.*, 2005, **17**, 8017-8028.
4. L. L. Li, Y. H. Cui, L. Y. Lu, Y. L. Liu, C. J. Zhu, L. J. Tian, W. W. Li, X. Zhang, H. Cheng, J. Y. Ma, J. Chu, Z. H. Tong and H. Q. Yu, *Environ. Sci. Technol.*, 2019, **53**, 2344-2352.
5. L. J. Tian, W. W. Li, T. T. Zhu, J. J. Chen, W. K. Wang, P. F. An, L. Zhang, J. C. Dong, Y. Guan, D. F. Liu, N. Q. Zhou, G. Liu, Y. C. Tian and H. Q. Yu, *J. Am. Chem. Soc.*, 2017, **139**, 12149-12152.
